1 Title: Negative Control Exposures: Causal effect Identifiability and Use in Probabilistic-Bias and  
2 Bayesian Analyses with Unmeasured Confounders

3 Authors: Flanders WD, Waller LA, Zhang Q, Getahun D, Silverberg M, Goodman M.

4 *Corresponding Author:* W. Dana Flanders, [wflande@emory.edu](mailto:wflande@emory.edu); phone: 404-633-7766

5 *Author affiliations:* Department of Epidemiology, Rollins School of Public Health, Emory University,  
6 Atlanta, GA 30345 (Flanders WD, Zhang Q, Goodman M); Department of Biostatistics and  
7 Bioinformatics, Rollins School of Public Health, Emory University, Atlanta, GA (Flanders WD, Waller  
8 LA); Department of Research and Evaluation, Kaiser Permanente Southern California, Pasadena, CA  
9 (Getahun D); Division of Research, Kaiser Permanente, Northern California, Oakland, CA (Silverberg M)

10 *Funding information:* This work was supported by Contract AD-12-11-4532 from the Patient Centered  
11 Outcome Research Institute and Grant R21HD076387 from the Eunice Kennedy Shriver National  
12 Institute of Child Health and Human Development.

13 *Conflict of Interest Statement:* Drs. Flanders and Goodman and Ms. Zhang provide consulting services  
14 through Epidemiologic Research & Methods, LLC. This company is owned by Dr. Flanders and provides  
15 consulting services to clients. None of the work on the present paper was related to that consulting.

16 **Suggested Running Head:** Negative Controls: Effect Identification & Bias Analyses

17 **Keywords:** bias, confounding, negative controls, negative control exposure, probabilistic bias analysis,  
18 Bayesian Analysis, adjustment.

19 **Abbreviations:** RR- risk ratio; CE- causal effect.

20 **Publication history:** This manuscript was submitted to *Epidemiology* (03/17/22), and to medRxiv  
21 05.24.22.

1 **Abstract:**

2 Probabilistic bias and Bayesian analyses are important tools for bias correction, particularly if required  
3 parameters are nonidentifiable. Negative controls are another tool; they can detect confounding and  
4 correct for confounders. Our goals are to present conditions that assure identifiability of certain causal  
5 effects and to describe and illustrate a probabilistic bias analysis and related Bayesian analysis that use a  
6 negative control exposure.

7 Using potential-outcome models, we characterize assumptions needed for identification of causal effects  
8 using a dichotomous, negative control exposure when residual confounding exists. We define bias  
9 parameters, characterize their relationships with the negative control and with specified causal effects,  
10 and describe the corresponding probabilistic-bias and Bayesian analyses.

11 We exemplify analyses using data on hormone therapy and suicide attempts among transgender people.  
12 To address possible confounding by healthcare utilization, we used prior Tdap (tetanus-diphtheria-  
13 pertussis) vaccination as a negative control exposure. Hormone therapy was weakly associated with risk  
14 (risk ratio (RR) = 0.9). The negative control exposure was associated with risk (RR = 1.7), suggesting  
15 confounding. Based on an assumed prior distribution for the bias parameter, the 95% simulation interval  
16 for the distribution of confounding-adjusted RR was (0.17, 1.64), with median 0.5; the 95% credibility  
17 interval was similar.

18 A dichotomous negative control exposure can be used to identify causal effects when a confounder is  
19 unmeasured under strong assumptions. More realistically, assumptions can be relaxed and the negative  
20 control exposure may prove helpful for probabilistic bias analyses and Bayesian analyses.

21  
22

23 **Introduction:**

24 Residual confounding often threatens valid estimation of causal effects, especially absent randomization  
25 of exposure. In a potential outcome framework, confounding implies non-exchangeability, defined below  
26 as an association of the exposure with the potential outcomes.

27 Numerous approaches can adjust for, or otherwise account for measured confounders, including  
28 restriction to a single level of the confounder, control or adjustment by stratification or modelling in the  
29 analysis, difference in difference and regression discontinuity analyses, and use of instrumental  
30 variables<sup>1</sup>.

31 To detect residual confounding, perhaps due to an unmeasured or mis-measured confounder, one can use  
32 a *negative control outcome* or *negative control exposure*<sup>2</sup>. A negative control exposure, our focus, is a

1 variable that does not cause the outcome but is associated with the suspected, but unmeasured confounder  
2 (detailed in methods). In an early application, Yerushalmy studied the effects of maternal cigarette  
3 smoking on birth weight (reprinted<sup>3</sup>). To detect confounding, he assessed the association of paternal  
4 smoking with his offspring's birthweight; this alternative "exposure" was contemporaneously thought not  
5 to affect the outcome of interest – a negative control exposure; he observed an association and interpreted  
6 it as suggesting confounding. Later work using cotinine levels suggested this use of paternal smoking as  
7 a negative control was valid<sup>2,4</sup>. As another example, Flanders et al. studied the effects of air pollution on  
8 emergency department visits for respiratory diseases. They used pollutant levels the day after the outcome  
9 had occurred, which could not cause the outcome, as a negative control exposure to detect residual  
10 confounding or other bias<sup>5,6</sup>. A study of influenza vaccination and deaths from influenza<sup>7</sup> exemplifies  
11 negative control outcomes. A strong association of vaccination status with influenza deaths *before* the  
12 influenza season (an alternative "outcome" thought to be unaffected by the exposure of interest – a  
13 negative control outcome) suggested bias in the estimated effect of vaccination. Lipsitch et al. discussed  
14 and formalized these concepts for detection of residual confounding<sup>8</sup>.

15 Much subsequent work goes beyond bias detection to use negative controls to adjust for residual  
16 confounding<sup>2,9</sup>. Flanders et al. used a negative control exposure to partially correct for residual  
17 confounding<sup>10</sup>. Their approach, however, involved certain distributional assumptions. Other approaches  
18 have involved outcome calibration under a rank preservation assumption<sup>11</sup>, and use of a linear model for  
19 the unmeasured confounder with factor analysis<sup>12,13</sup>. Miao et al. recently provided conditions that, if met,  
20 allow identification of causal effects by using two negative controls, which can act as surrogates for the  
21 unmeasured confounder(s)<sup>14-16</sup>.

22 Assumptions needed for identifiability can be rather strong if a confounder remains unmeasured. For  
23 example, in the categorical case, the approach of Miao et al.<sup>14</sup> requires two negative controls that serve as  
24 proxies for the unmeasured confounder (say U). They must have several properties including: each proxy  
25 has at least as many categories as U, the proxies are independent conditional on U and certain probability  
26 matrices have inverses.

27 Probabilistic bias analyses can address residual biases in the effect estimate that remain after conventional  
28 analyses<sup>17</sup>. For residual confounding, probabilistic bias analyses use substantive knowledge to help  
29 formulate a distribution of bias parameters that characterize unobserved associations (specified in  
30 methods), apply that distribution to correct conventional effect estimates, such as risk ratios, and produce  
31 a distribution of plausible corrected estimates. Our goals are to describe and illustrate a method that uses a  
32 negative control exposure to partially correct for confounding and to formulate probabilistic bias analyses.  
33 We extend the approach to a fully Bayesian analysis.

1 **Methods:**

2 *Background, Notation, and Definitions*

3 Our specific objectives are to: present and justify conditions sufficient for using a negative control  
4 exposure ( $N$ ) to identify causal effects of an exposure ( $E$ ) on an outcome ( $Y$ ) when a confounder ( $U$ ) is  
5 unmeasured; describe probabilistic bias analyses to address confounding that incorporate information  
6 from the negative control; describe a related Bayesian formulation (Appendix 2); and, provide R code to  
7 implement these analyses. Here, we measure effects with risk ratios observable in a cohort study. These  
8 approaches rely on substantive knowledge to inform the choice of the prior distribution of plausible bias  
9 parameters.

10 We assume measured confounders, denoted collectively by  $X$ , are categorical, or can be adequately  
11 approximated as categorical to control confounding (this imposes little restriction other than regularity  
12 conditions). All results are conditional on  $X$ , but for simplicity that dependence is suppressed in the  
13 notation. For example,  $M_{enx}$  denotes the number of people at baseline in the cohort with  $E = e, N = n,$   
14  $X = x$  for  $e, n = 0, 1$  and  $x = 1, 2, \dots, |X|$  where  $|X|$  is the cardinality of  $X$ ; but for simplicity we write  
15  $M_{en}$  (conditioning on  $X = x$  is implicit). Conditional risk, defined as the probability that the outcome  
16 occurs ( $Y = 1$ ) during the follow-up period among those with  $E = e, N = n$  at baseline in the cohort, is  
17 denoted by  $R_{en} = p(Y = 1 | E = e, N = n) = E(Y | E = e, N = n)$ . We denote the counterfactual outcome  
18 and counterfactual risk among those with  $E = e, N = n$ , if  $E$  were set to  $e'$  by  $Y(e')$  and  $R_{en}(e') =$   
19  $E[Y(e') | E = 1, N = n]$  for  $e, n, e' = 0$  or  $1$  (Table 1), respectively;  $R_{en}(1)$  or  $R_{en}(0)$  must be  
20 counterfactual. Similarly,  $R(e)$  is the counterfactual risk in the population if  $E$  were set to  $e$  for all.

21 The assumed causal relationships are summarized in Figure 1, a Single World Intervention Template  
22 (SWIT)<sup>18</sup>. The causal relationships in the SWIT, assumed correct, imply and are consistent with  
23 assumptions A1–A4:

24 A1)  $N \perp\!\!\!\perp E, Y(e) | U, X$ ;  $Y(n, e) = Y(e)$ , conditional independence between  $N$  and  $E, Y$ ;  $N$  has no effect;

25 A2)  $E \perp\!\!\!\perp Y(e) | U, X$ ; conditional exchangeability;

26 A3) Conditional on  $E, X$ , we expect the negative control to be associated with  $Y$  and unmeasured  
27 confounders  $U$ ;

28 A4)  $R_{en}(e') = R_{en}$  and  $R_{en,u}(e') = R_{en,u}$  if  $e' = e$ ; counterfactual-model consistency.

29 Ideal or U-comparable negative control exposures described by Lipsitch et al.<sup>8</sup> should satisfy  
30 assumptions A1 – A4 (Web Appendix S4). However, additional variables that are not ideal or U-  
31 comparable negative controls can satisfy A1 – A4, serve as indicators of residual confounding or other

1 bias<sup>10</sup> and be used for the probabilistic bias or Bayesian analyses described here (e.g., Supplemental  
2 Figure S3).

3 We consider the causal effects of exposure among those with  $E = e, N = n$ , denoted by  $CE_{en}$  for  $e, n =$   
4  $0,1$  (Table 1). Using risk ratios and counterfactuals, we express  $CE_{en}$  as:

5 1)  $CE_{en} = R_{en}(1)/R_{en}(0)$  for  $e, n = 0,1$ ;

6 and, the population average causal effect as:

7 2)  $PACE = R(1)/R(0)$ .

8 In the remainder of methods we first consider  $CE_{10}$  in detail, providing and justifying assumptions under  
9 which  $CE_{10}$  can be identified. We then introduce a bias parameter to relax the assumption needed for  
10 identification and use this parameter as the basis for probabilistic bias analyses. Finally, we consider  
11 other causal effects. In Appendix 2 provide a fully Bayesian formulation of our approach.

12 *Identifiability Conditions and Probabilistic Bias Analysis for  $CE_{10}$*

13 We show that  $CE_{10}$  is identifiable in a cohort study under an easily-specified, but strong assumption  
14 involving the distribution of the negative control  $N$ .

15 Consistent with the pattern of causal effects summarized in Figure 1 and assumptions (A1)-(A4), we can  
16 write the identifiable risk  $R_{00}$  as:

17 3)  $R_{00} = \frac{\sum_u R_{00u} P(E=0|U=u) P(N=0|U=u) p(U=u)}{\sum_u p(E=0|U=u) p(N=0|U=u) p(U=u)}$

18 where  $R_{enu}$  is the conditional risk among those with  $E = e, N = n, U = u$ . Let  $R_{enu}(e')$  denote the  
19 counterfactual risk among those with  $E = e, N = n, U = u$  and  $E$  was set to  $e'$ . We can write the  
20 counterfactual risk  $R_{10}(0)$  as the weighted average:

21 4)  $R_{10}(0) = \frac{\sum_u R_{10u}(0) P(E=1|U=u) P(N=0|U=u) p(U=u)}{\sum_u p(E=1|U=u) p(N=0|U=u) p(U=u)}$   
22  $= \frac{\sum_u R_{00u}(0) P(E=1|U=u) P(N=0|U=u) p(U=u)}{\sum_u p(E=1|U=u) p(N=0|U=u) p(U=u)}$  (substitute  $R_{00u}(0)$  for  $R_{10u}(0)$ , assumption A2)  
23  $= \frac{\sum_u R_{01u}(0) P(E=1|U=u) P(N=0|U=u) p(U=u)}{\sum_u p(E=1|U=u) p(N=0|U=u) p(U=u)}$  (substitute  $R_{01u}(0)$  for  $R_{00u}(0)$  by A1)  
24  $= \frac{\sum_u R_{01u} P(E=1|U=u) P(N=0|U=u) p(U=u)}{\sum_u p(E=1|U=u) p(N=0|U=u) p(U=u)}$  (substitute  $R_{01u}$  for  $R_{01u}(0)$  by consistency)

25 We now state two assumptions either of which, with Assumptions (A1-A4), suffices (Claim 1) to assure  
26 identifiability of  $CE_{10}$ :

1 A5a)  $p(E = 1|U = u) = p(N = 1|U = u)$  for all  $u$ ; (equality of conditional distributions) or

2 A5b)  $p(U = u|E = 1, N = 0) = p(U = u|E = 0, N = 1)$ , for all  $u$ .

3 Claim 1: Under assumptions (A1-A4) and (A5a) or (A5b): (i)  $R_{10}(0) = R_{01}$ ; and (ii)  $CE_{10}$  is identified by  
4 the ratio of observable risks  $R_{10}/R_{01}$ .

5 Proof: By assumption (A5a), we can substitute  $p(N = 1|U = u)$  for  $p(E = 1|U = u)$ , and  $p(E = 0|U =$   
6  $u)$  for  $p(N = 0|U = u)$  into the last line of Expression (4), showing that  $R_{10}(0) =$

7  $\frac{\sum_u R_{01u} P(E=0|U=u) P(N=1|U=u) p(U=u)}{\sum_u p(E=0|U=u) p(N=1|U=u) p(U=u)}$  which equals  $R_{01}$  proving (i). Proof of Claim (i) using (A5b) is

8 similar (Web Appendix S5). Now,  $CE_{10} = \frac{R_{10}}{R_{10}(0)}$  which, by (i), equals  $\frac{R_{10}}{R_{01}}$ . The latter is consistently

9 estimated by the ratio of observable risks in the appropriate subgroups of the cohort study, proving (ii).

10 Following Claim 1, we take the identifiable risk ratio  $R_{10}/R_{01}$  as the estimator of  $CE_{10}$ .

11 Note: The intuition behind this estimator is that the distortion caused by the association of the  
12 unmeasured variable  $U$  with exposure – is compensated for and balanced by the association of  $U$  with the  
13 negative control; under assumption (A5b), the distribution of  $U$  is the same in the groups being compared.

14 Assumptions (A5a-A5b) differ from the equi-distributional confounding assumption of Sofer et al.<sup>19</sup>  
15 which concerns equality of the conditional distributions of the outcome and of a negative control outcome  
16 (NCO); see also the “confounding bridge” assumption of Miao et al.<sup>20</sup> that involves conditional  
17 distributions of the NCO and the outcome, rather than the negative control exposure and the exposure.

18 There is some plausibility that assumption (A5a) or (A5b) would hold, at least approximately, since  
19 negative controls “... should be selected such that they share a common confounding mechanism as the  
20 exposure and outcome variables ...”<sup>2</sup>. Nevertheless, the assumption (A5a) or (A5b) is strong and, with  $U$   
21 unmeasured, unverifiable. Therefore, we introduce a bias parameter that allows for deviations from (A5a-  
22 A5b) and that can be used in probabilistic bias analyses. In particular, we relax the key implication of  
23 assumption (A5a, A5b) that  $R_{10}(0) = R_{01}$ , and instead assume:

24 A5c)  $\frac{R_{10}(0)}{1-R_{10}(0)} = \varepsilon_1 \frac{R_{01}}{1-R_{01}}$ .

25 A5c assumes that the counterfactual odds  $R_{10}(0)$  is equal to the (observable) odds  $R_{01}/(1 - R_{01})$  times a  
26 bias parameter  $\varepsilon_1$ . Using risk odds in assumption (A5c), rather than say risks, assures that  $R_{10}(0)$  is not  
27 outside the range  $(0,1)$  for  $\varepsilon_1 \in (0, \infty)$ . Substituting  $\varepsilon_1 R_{01}/(1 - R_{01} + \varepsilon_1 R_{01})$  for  $R_{10}(0)$ , justified by  
28 Assumption (A5c), gives:

$$1 \quad 5) \quad CE_{10} = \frac{R_{10}}{R_{10}(0)} = \frac{1}{\varepsilon_1} \frac{R_{10}(1-R_{01}+\varepsilon_1 R_{01})}{R_{01}}$$

2 Note: The bias parameter  $\varepsilon_1$  reflects residual bias in  $R_{10}$  as an estimator of the counterfactual risk  $R_{10}(0)$   
3 on the odds scale. Equation (5) shows that  $\varepsilon_1$  equals the ratio of the estimator to the causal effect,  
4 sometimes referred to as the confounding risk ratio<sup>1,21-23</sup>, multiplied by  $(1 - R_{01}(1 - \varepsilon_1))$ . For rare  
5 outcomes,  $(1 - R_{01}(1 - \varepsilon_1)) \approx 1$ , and  $\varepsilon_1$  approximates the confounding risk ratio. This  
6 conceptualization may aid interpretation (see also, Supplemental Web Appendix S1).

7 To implement a probabilistic bias analysis for residual confounding, we specify a distribution for  $\varepsilon_1$  (with  
8 support from 0 to infinity); the distribution has greater or less weight in the tails, depending on the extent  
9 to which  $R_{10}(0)$  and  $R_{01}$  are thought to differ (reflecting differences in the conditional distributions of  $E$   
10 and  $N$ ). If the negative-control association with  $U$  is thought to mirror the corresponding exposure  
11 association fairly accurately, the  $\varepsilon_1$ -distribution can be formulated with a substantial probability that  $\varepsilon_1$  is  
12 near 1, whereas if the associations differ substantially, greater weight can be assigned elsewhere. An R  
13 program to implement probabilistic bias analysis is given in Web Appendix S2. Using a Monte Carlo  
14 approach, the program: randomly selects a value of the bias parameter from the specified distribution;  
15 applies the bias model to calculate the counterfactual risk ( $R_{10}(0)$ , Assumption A5c); accounts for  
16 random error by sampling  $R_{10}(0)$  and  $R_{10}$  from binomial distributions; applies Equation (5) to calculate a  
17 bias-adjusted estimate of  $CE_{10}$ ; and creates a simulation interval.<sup>17</sup>

#### 18 *Identifiability Conditions and Probabilistic Bias Analysis for $CE_{01}$*

19 Assumptions (A1-A4; A5a or A5b) imply that  $CE_{01} = CE_{10}$  (proven as Claim 2 in Web Appendix S5),  
20 which implies that  $CE_{01}$ , like  $CE_{10}$ , is identifiable as the ratio of observable risks  $R_{10}/R_{01}$ . To relax  
21 assumption (A5a or A5b) and conduct probabilistic bias analyses, we introduce a second bias parameter  
22 ( $\varepsilon_2$ ), that plays a role like that of  $\varepsilon_1$ :  $\varepsilon_2$  reflects differences between the estimator  $\frac{R_{10}}{R_{01}}$  based on observed  
23 risks and the estimand  $CE_{01}$ . We have assumption (A5d):

$$24 \quad A5d) \quad \frac{R_{01}(1)}{1-R_{01}(1)} = \varepsilon_2 \frac{R_{10}}{1-R_{10}}$$

25 implying:

$$26 \quad 6) \quad CE_{01} = \frac{R_{01}(1)}{R_{01}} = \frac{R_{10}}{R_{01}(\varepsilon_2 - \varepsilon_2 R_{10} + R_{10})}$$

27 By specifying a distribution for  $\varepsilon_2$  we can conduct probabilistic bias analyses for  $CE_{01}$ , like those for  
28  $CE_{10}$ .

#### 29 *Identifiability Conditions and Probabilistic Bias Analysis for $CE_{11}$ , $CE_{00}$ and PACE*

1 Causal effects  $CE_{11}$ ,  $CE_{00}$  and  $PACE$  can differ from  $CE_{10}$  and  $CE_{01}$  and so are not necessarily identified  
2 as  $R_{10}/R_{01}$  under Assumptions A1-A4, A5b. However, we can identify these effects if we can assume a  
3 multiplicative model for the effect of  $E$  given  $U$ , conditional on  $U = u$  and  $N = n$ :

4 A6)  $R_{enu}(e') = e^{\beta_1 \cdot e'} R_{0nu}$  (multiplicative homogeneity of effects E)

5 In words, assumption (A6) states that the counterfactual risk, if  $E$  were set to  $e'$ , is  $e^{\beta_1 \cdot e'}$  times the risk  
6 among those with  $E = 0$ ,  $N = n$  and  $U = u$ . We show in Appendix 1 (Claim 3) that Assumption (A6)  
7 implies that  $CE_{en}$  and  $PACE$  both equal  $\frac{R_{en(1)}}{R_{en(0)}} = e^{\beta_1}$ . By Assumptions (A1-A5),  $CE_{10}$  (and  $CE_{01}$ ) are  
8 identified, and therefore so are  $CE_{11}$ ,  $CE_{00}$  and  $PACE$ . Using bias parameters to account for errors in  
9 assumptions (A1-A6) and combining results, we have

10 A7)  $CE_{11} = \frac{1}{\varepsilon_3} CE_{10}$  and  $CE_{00} = \frac{1}{\varepsilon_4} CE_{10}$ .

11 Analyses based on use of  $\varepsilon_3$  and  $\varepsilon_4$  use the strong assumption of a multiplicative effect of exposure in  
12 addition to (A1-A5) and are viewed as supplementary.

### 13 *Fully Bayesian Analysis for $CE_{10}$ and $CE_{01}$*

14 Appendix 2 outlines use of prior distributions for  $R_{10}$  and  $R_{01}$  and two parameters  $\kappa_1$  and  $\kappa_2$  to provide a  
15 fully Bayesian formulation of the problem<sup>24</sup>. Parameters  $\kappa_1$  and  $\kappa_2$  (defined in Appendix 2: Equation 1A  
16 and just below) reflect the same associations in the Bayesian formulation as do  $\varepsilon_1$  and  $\varepsilon_2$  in probabilistic  
17 bias analyses. Web Appendix S3 documents an R program to implement Bayesian analyses for  $CE_{10}$  and  
18  $CE_{01}$ .

### 19 **Example**

20 We illustrate these methods by applying them to investigate the possible effect of gender-affirming  
21 hormone therapy on risk of suicide attempts. We use data from ongoing studies of transgender people  
22 <sup>25,26</sup>, summarized in Table 2. The cohort consists of people from two health plans in California, who were  
23 20 years old or younger on December 31, 2015, and received a transgender-specific diagnosis (e.g.,  
24 'gender dysphoria') by age 20. We defined exposure as receiving gender-affirming hormones or puberty  
25 suppression therapy at or before age 20. The outcome of interest was at least one episode of self-inflicted  
26 injury or poisoning, or any hospitalization or emergency room visit for a mental health problem  
27 documented in the medical records during the 1-year follow-up period starting at age 20. Web Appendix  
28 S6 includes additional descriptive information about the cohort. We were concerned about potential  
29 confounding by healthcare utilization, as greater utilization might associate with both more hormone  
30 therapy and more (documentation of) mental health diagnoses. Therefore, we used recorded receipt of



1 Tdap vaccine at or before age 20 years as a negative control exposure. If healthcare utilization was a  
2 confounder, we thought that Tdap vaccination should, like hormone therapy, be associated with both  
3 healthcare utilization and the outcome. The crude risk ratio ( $cRR$ ) for exposure is 0.88. After adjusting for  
4 the negative control, the Mantel-Haenszel  $mRR$  is 0.88 (95% CI: 0.56 – 1.38; Table 3). The negative  
5 control was associated with risk, both among the exposed ( $RR_1 = 1.70$ ; 95% CI: 0.76 – 3.79) and the  
6 unexposed ( $RR_2 = 1.66$ ; 95% CI: 1.07 – 2.56).

7 To implement the probabilistic bias analyses, we specify prior distributions for  $\varepsilon_1$ . As provided in the R  
8 program (Web Appendix S2), we chose a log-normal distribution for  $\varepsilon_1$ , with median 1 and the ratio of  
9 the 10<sup>th</sup> percentile to the median of 0.5. For this specification, the 10<sup>th</sup> and 90<sup>th</sup> percentiles of the prior for  
10  $\varepsilon_1$  are 0.50 and 2.0, indicating that  $\varepsilon_1$  will fall in this range with 80% probability under the prior. The  
11 resulting distribution of confounding-adjusted causal effect estimates (simulation intervals)<sup>17</sup> is given in  
12 Figure 2, for the assumed prior. The 95% simulation interval is from 0.17 to 1.64, with median 0.52.  
13 These results are approximately interpretable as semi-Bayesian, as the bias parameter is sampled from a  
14 prior distribution<sup>17</sup>. Using the fully Bayesian analysis described in Appendix 2 with uninformative priors  
15 for  $P(Y = 1|E = 1, N = 2)$  and  $P(Y = 1|E = 2, N = 1)$ , a log-normal prior for  $\kappa_1$  and setting the  
16 median of the prior (log-normal) to 1 and the variance so that the ratio of the median to the 10<sup>th</sup> percentile  
17 was 0.5, the 95% credibility interval was (0.19 to 1.69) with median 0.54. In a sensitivity analysis, we  
18 doubled the variance of the prior for  $\kappa_1$ - reflecting greater uncertainty in the value of the bias parameter.  
19 The 95% credibility interval was then (0.16, 2.08).

20

## 21 Discussion

22 We have justified assumptions that, if correct, imply one can use a negative control exposure to account  
23 for unmeasured confounding and identify causal effects ( $CE_{10}$  and  $CE_{01}$ ). If exposure effects are  
24 multiplicative, this suffices to also identify  $CE_{11}$  and  $CE_{00}$  as well as other effects, such as the population  
25 average effect. The key assumption (A5a or A5b) is strong, so we have also described and illustrated two  
26 ways to relax the assumption. These inter-related methods, probabilistic bias analyses and Bayesian  
27 analyses, both use information from a negative control exposure to account for residual confounding and  
28 require the researcher to specify a prior distribution for a bias parameter; they yielded similar results, as  
29 expected, in our example. Our formulation of probabilistic bias analyses, as is common<sup>17</sup>, includes a bias  
30 model, postulating a prior distribution for the bias parameters, and Monte Carlo simulation to obtain a  
31 distribution for the bias-adjusted estimate of interest. Our method extends the approach to incorporate  
32 information from the negative control. We also describe a complementary Bayesian formulation.

1 Exchangeability implies that risk among those actually exposed is the same as the risk among the  
2 unexposed if they had been exposed, and conversely; it can be defined as independence of the actual  
3 exposure and response types<sup>27-29</sup>. The methods proposed for addressing non-exchangeability are natural  
4 ones in the sense that they use the negative control as a reflection of exposure associations with  
5 unmeasured confounders that define non-exchangeability. If the negative control has more than two  
6 categories, say  $N = n$  for  $n = 0, 1, \dots, N$ , then the approach described here is still applicable by selecting  
7 two categories (or combinations of categories) and contrasting them. For example, if a priori knowledge  
8 suggested that  $P(U = u|E = 1, N = 0) \approx P(U = u|E = 0, N \in S_1)$  where  $S_1 = \{3, 4\}$ , then  $R_{10}(0)$  could  
9 be estimated by  $R_{0S_1}$ . To the extent allowed by *a priori* knowledge, original categories can be combined  
10 to most closely approximate the identifying assumption.

11 Two causal effects are most readily addressed by the proposed approach, the effect of exposure among  
12 the exposed without negative control exposure ( $E = 1, N = 0$ ), and the effect of exposure among the  
13 unexposed with negative control exposure ( $E = 0, N = 1$ ). The researcher can use substantive knowledge  
14 to assess how well the association of the negative control with the unmeasured confounder reflects the  
15 association of exposure with the confounder. In the example when using Bayesian analyses, doubling the  
16 variance of the prior distribution for  $\kappa_1$  led to wider credibility intervals, but not substantially so  
17 (Example 1) – suggesting some degree of robustness to a modest change in uncertainty regarding the prior  
18 distribution of  $\kappa_1$ . While it is possible to extend the approach to apply it to effects in other subgroups and  
19 to a population average causal effect (Appendix 1), assignment of the prior distribution is perhaps more  
20 uncertain because an additional assumption (multiplicative effect of exposure) is needed. Therefore, we  
21 view these additional analyses as secondary. We caution that an association between a negative control  
22 and the outcome can reflect bias other than non-exchangeability, such model mis-specification<sup>5</sup>. Our  
23 analyses are not designed to correct for these other biases.

24 Results of the probabilistic bias analysis and the Bayesian analysis both utilize a negative control to  
25 correct for residual confounding and are based on researcher-supplied inputs that are informed, to the  
26 extent possible, on subject matter knowledge. The probabilistic bias analyses depend on the prior  
27 distributions for  $\varepsilon_1$  and  $\varepsilon_2$  and the Bayesian results on those for  $\kappa_1$  and  $\kappa_2$ ; here we used log-normal  
28 distributions for both. With a non-informative prior for the other parameters, the 95% credibility interval  
29 (Bayesian analysis) was similar to the simulation interval (probabilistic bias analysis). Absent  
30 assumptions (such as A5b), parameters  $\kappa_1$  and  $\kappa_2$  or bias parameters  $\varepsilon_1$  and  $\varepsilon_2$  are not identifiable;  
31 however, “indirect learning” is possible<sup>30</sup>, evidenced here in the change from prior to posterior  
32 distribution of  $\kappa_1$  (Web Appendix S1: Figures S1 and S2). This indirect learning and changes in the  
33 distributions result from learning about the identifiable parameters<sup>30</sup>.

1 In some situations, when the confounder is known but unmeasured, external results may provide direct  
2 estimates of  $\kappa_1$  or  $\varepsilon_1$ . For example using equation 5,  $\varepsilon_1$  could be estimated as  $\varepsilon_1 = \frac{R_{10} - R_{10}R_{01}}{aCE_{10}R_{01} - R_{10}R_{01}}$   
3 where  $aCE_{10}$  is an external estimate of the causal effect (e.g., adjusted for all confounders in a study  
4 where U was measured). However, if external measurements of the exposure, confounders and outcome  
5 are available, we can also consider other, possibly more efficient, approaches<sup>17</sup> or perhaps use of a  
6 directly calculated confounding risk ratio. We could also use priors for both  $\kappa_1$  and a causal effect (e.g.,  
7  $CE_{01}$ ), plus another parameter (e.g.,  $R_{10}$ ). Evaluation of the posterior distribution, however, would likely  
8 then require Gibbs sampling or other technique more complicated than the straightforward one used here.

9 In summary, we have provided assumptions sufficient for using a negative control to identify causal  
10 effects when a confounder is unmeasured, and have described and illustrated the application of both  
11 probabilistic bias analysis and Bayesian formulations to address residual confounding. The latter methods  
12 use a negative control exposure, use researcher-supplied prior information about how well the negative  
13 control captures the associations that create confounding, and produce results partially adjusted for the  
14 residual confounding.

15

## 1 References

- 2 1. Lash TLV, Tyler J., Haneuse S, Rothman KJ. *Modern epidemiology*. 4th ed. Philadelphia: Wolters  
3 Kluwer Health/Lippincott Williams & Wilkins; 2021.
- 4 2. Shi X, Miao W, Tchetgen Tchetgen EJ. A selective review of negative control methods in  
5 epidemiology. *Current Epidemiology Reports*. 2020;1-13.
- 6 3. Yerushalmy J. The relationship of parents' cigarette smoking to outcome of pregnancy—  
7 implications as to the problem of inferring causation from observed associations. *International*  
8 *journal of epidemiology*. 2014;43(5):1355-1366.
- 9 4. Taylor AE, Smith GD, Bares CB, Edwards AC, Munafò MR. Partner smoking and maternal cotinine  
10 during pregnancy: implications for negative control methods. *Drug and alcohol dependence*.  
11 2014;139:159-163.
- 12 5. Flanders WD, Klein M, Darrow LA, et al. A Method to Detect Residual Confounding in Spatial and  
13 Other Observational Studies. *Epidemiology (Cambridge, Mass)*. 2011;22(6):823.
- 14 6. Flanders WD, Klein M, Strickland M, et al. A method of identifying residual confounding and  
15 other violations of model assumptions. *Epidemiology*. 2009;20(6):S44-S45.
- 16 7. Jackson LA, Jackson ML, Nelson JC, Neuzil KM, Weiss NS. Evidence of bias in estimates of  
17 influenza vaccine effectiveness in seniors. *International journal of epidemiology*. 2006;35(2):337-  
18 344.
- 19 8. Lipsitch M, Tchetgen Tchetgen EJ, Cohen T. Negative Controls: A Tool for Detecting Confounding  
20 and Bias in Observational Studies. *Epidemiology*. 2010;21(3):383-388.
- 21 9. Swanson SA, Hernán MA, Miller M, Robins JM, Richardson TS. Partial identification of the  
22 average treatment effect using instrumental variables: review of methods for binary  
23 instruments, treatments, and outcomes. *Journal of the American Statistical Association*.  
24 2018;113(522):933-947.
- 25 10. Flanders WD, Strickland MJ, Klein M. A new method for partial correction of residual  
26 confounding in time-series and other observational studies. *American journal of epidemiology*.  
27 2017;185(10):941-949.
- 28 11. Tchetgen Tchetgen EJ. The control outcome calibration approach for causal inference with  
29 unobserved confounding. *American journal of epidemiology*. 2014;179(5):633-640.
- 30 12. Wang J, Zhao Q, Hastie T, Owen AB. Confounder adjustment in multiple hypothesis testing.  
31 *Annals of statistics*. 2017;45(5):1863.
- 32 13. Jacob L, Gagnon-Bartsch JA, Speed TP. Correcting gene expression data when neither the  
33 unwanted variation nor the factor of interest are observed. *Biostatistics*. 2016;17(1):16-28.
- 34 14. Miao W, Geng Z, Tchetgen Tchetgen EJ. Identifying causal effects with proxy variables of an  
35 unmeasured confounder. *Biometrika*. 2018;105(4):987-993.
- 36 15. Shi X, Miao W, Nelson JC, Tchetgen Tchetgen EJ. Multiply robust causal inference with double-  
37 negative control adjustment for categorical unmeasured confounding. *Journal of the Royal*  
38 *Statistical Society: Series B (Statistical Methodology)*. 2020;82(2):521-540.
- 39 16. Kuroki M, Pearl J. Measurement bias and effect restoration in causal inference. *Biometrika*.  
40 2014;101(2):423-437.
- 41 17. Lash TL, VanderWeele TJ, Haneuse S, Rothman KJ. Bias Analysis (Chapter 21). In: *Modern*  
42 *Epidemiology*. 4th ed. Philadelphia: Wolters Kluwer Health/Lippincott Williams & Wilkins;  
43 2021:711-754.
- 44 18. Richardson TS, Robins JM. Single World Intervention Graphs (SWIGs): A Unication of the  
45 Counterfactual and Graphical Approaches to Causality. *Working Paper Number 128, Center for*  
46 *Statistics and the Social Sciences, University of Washington*.  
47 2013:<http://www.csss.washington.edu/Papers/wp128.pdf>.

- 1 19. Sofer T, Richardson DB, Colicino E, Schwartz J, Tchetgen Tchetgen E. On negative outcome  
2 control of unobserved confounding as a generalization of difference-in-differences. *Statistical*  
3 *science: a review journal of the Institute of Mathematical Statistics*. 2016;31(3):348.
- 4 20. Miao W, Shi X, Tchetgen Tchetgen EJ. A confounding bridge approach for double negative  
5 control inference on causal effects. *arXiv preprint arXiv:180804945*. 2018.
- 6 21. Flanders WD, Khoury M. Indirect assessment of confounding: graphic description and limits on  
7 effect of adjusting for covariates. *Epidemiol*. 1990;1(3):239-246.
- 8 22. Yanagawa T. Case-control studies: assessing the effect of a confounding factor. *Biometrika*.  
9 1984;71(1):191-194.
- 10 23. Miettinen OS. Components of the crude risk ratio. *American Journal of Epidemiology*.  
11 1972;96(2):168-172.
- 12 24. Greenland S. Multiple-bias modelling for analysis of observational data. *Journal of the Royal*  
13 *Statistical Society: Series A (Statistics in Society)*. 2005;168(2):267-306.
- 14 25. Mak J, Shires DA, Zhang Q, et al. Suicide attempts among a cohort of transgender and gender  
15 diverse people. *American journal of preventive medicine*. 2020;59(4):570-577.
- 16 26. Goodman M, Nash R. Examining health outcomes for people who are transgender. *Washington,*  
17 *DC: Patient-Centered Outcomes Research Institute (PCORI)* <https://doi.org/10.25302/22019AD>.  
18 2018;12114532.
- 19 27. Flanders WD, Eldridge RC. Summary of relationships between exchangeability, biasing paths and  
20 bias. *European journal of epidemiology*. 2015;30(10):1089-1099.
- 21 28. Hernán MA. A definition of causal effect for epidemiology. *J Epidemiol Community Health*.  
22 2004;58:265-271.
- 23 29. Greenland S, Robins J. Identifiability, exchangeability, and epidemiologic confounding. *Int J*  
24 *Epidemiol*. 1986;15:413-419.
- 25 30. Gustafson P. On model expansion, model contraction, identifiability and prior information: two  
26 illustrative scenarios involving mismeasured variables. *Statistical science*. 2005;20(2):111-140.

27

28

1 **Appendix 1**

2 Claim 3: Under assumptions (A1-A4, A5b, and A6),  $CE_{en} = R_{en}(1)/R_{en}(0) = e^{\beta_1}$  and  $PACE = e^{\beta_1}$ .

3 Proof:  $R_{en}(e')$  is a weighted average of the counterfactual outcomes  $R_{enu}(e')$ . Therefore:

$$\begin{aligned}
 4 \quad \frac{R_{en}(1)}{R_{en}(0)} &= \frac{\sum_u R_{enu}(1)P(E=e|U=u)P(N=n|U=u)p(U=u)}{\sum_u p(E=e|U=u)p(N=n|U=u)p(U=u)} / \frac{\sum_u R_{enu}(0)P(E=e|U=u)P(N=n|U=u)p(U=u)}{\sum_u p(E=e|U=u)p(N=n|U=u)p(U=u)} \\
 5 &= \frac{\sum_u R_{enu}(1)P(E=e|U=u)P(N=n|U=u)p(U=u)}{\sum_u R_{enu}(0)P(E=e|U=u)P(N=n|U=u)p(U=u)} \\
 6 &= \frac{\sum_u R_{enu}(0)e^{\beta_1}P(E=e|U=u)P(N=n|U=u)p(U=u)}{\sum_u R_{enu}(0)P(E=e|U=u)P(N=n|U=u)p(U=u)} \\
 7 &= e^{\beta_1}.
 \end{aligned}$$

8 Thus:  $CE_{11} = CE_{00} = CE_{10} = CE_{01}$ . The  $PACE$  is a weighted average of the four  $E, N$  – specific effects  
 9  $CE_{en}$  (with weights  $P(E = e, N = n)$ ), so  $PACE$  equals the common value  $e^{\beta_1}$ .

10

11 **Appendix 2**

12 The Appendix describes a Bayesian formulation of our approach. The analytic goal now is to calculate  
 13 Bayesian credibility intervals and the posterior median for the causal effects, conditional on the  
 14 observations and using the negative control exposure. We use the terminology and definitions from  
 15 Lash<sup>1,17</sup>. We present details only for the analysis of  $CE_{10}$ , as those for  $CE_{01}$  are directly analogous.  
 16 Results for  $CE_{11}$  and  $CE_{00}$  depend on an additional, strong assumption and are considered supplementary.

17 Parameters

18 The bias parameter  $\varepsilon_1$  of the main text was introduced to relax assumption (A5a); it allows for differences  
 19 between the distribution of  $E$  given  $U$  and that of  $N$  given  $U$ . Following assumption (A5c), we define the  
 20 (relative) bias parameter  $\varkappa_1$  as:

$$21 \quad 1A) \quad \varkappa_1 = \frac{R_{10}(0)}{1-R_{10}(0)} / \frac{R_{01}}{1-R_{01}}.$$

22 Parameters  $R_{10}, R_{01}$  (Table 1) and  $\varkappa_1$  fully parameterize the conditional distributions of: outcome  $Y$   
 23 and  $Y(0)$  among those with  $E = 1, N = 0$ , and those among individuals with  $E = 0, N = 1$ . For  
 24 example, the distribution of  $Y(0)$  among those with  $E = 1, N = 0$  is:

$$25 \quad P(Y(0) = 1|E = 1, N = 0) = R_{10}(0) = \varkappa_1 R_{01} / (1 - R_{01} + \varkappa_1 R_{01}), \text{ (expression 1A).}$$

26  $CE_{10}$  can be expressed using only  $R_{10}, R_{20}$  and  $\varkappa_1$ . Much like  $\varepsilon_1$ , we define  $\varkappa_2 = \frac{R_{01}(1)}{1-R_{01}(0)} / \frac{R_{10}}{1-R_{10}}$  so that  
 27  $P(Y(1) = 1|E = 0, N = 1) = R_{01}(1) = R_{10}/R_{01}(\varepsilon_2 - \varepsilon_2 R_{10} + R_{10})$ . This formulation parallels that of  
 28 probabilistic bias analysis in the main text; e.g., Equation 1A replaces Assumption A5a).

1 Sampling Distribution

2 The conditional likelihood of the observed data, given the parameters  $R_{10} = p_1$  and  $R_{01} = p_2$  is:

3 2A)  $P(Y = y_1 | E = 1, N = 0, R_{10} = p_1)P(Y = y_0 | E = 0, N = 1, R_{01} = p_0)$   
 4 
$$= \frac{M_{10}!}{(M_{10}-y_1)!y_1!} p_1^{y_1} (1 - p_1)^{(M_{10}-y_1)} \frac{M_{01}!}{(M_{01}-y_0)!y_0!} p_0^{y_0} (1 - p_0)^{(M_{01}-y_0)}$$

5  $y_1$  is the number of subjects with  $y_1 = 1, E = 1$  and  $N = 0$ ;  $M_{10}$  is the number with  $E = 1$  and  $N = 0$ ;  $y_0$   
 6 and  $M_{01}$  are the corresponding numbers where  $E = 0$  and  $N = 1$ ; the “data” are  $y_1, M_{10}, y_0, N_{01}, E$  and  $N$ .

7 Prior Distributions for parameters  $R_{10}, R_{01}$ , and  $\kappa_1$

8

9 We use a log-normal prior for  $\kappa_1$ :

10 3A)  $f_{\kappa_1}(\ln(e_1)) = \frac{1}{e_1 \sigma_1 \sqrt{2\pi}} e^{-\frac{1}{2}(\ln(e_1) - \mu_1)^2 / \sigma_1^2}$  for  $0 \leq \kappa_1 < \infty$  and 0 elsewhere,

11 where  $\mu_1$  and  $\sigma_1^2$  are the mean and variance of  $\ln(e_1)$  The median of  $e_1$  is  $e^{\mu_1}$  and the variance is  
 12  $(e^{\sigma_1^2} - 1)e^{2\mu_1 + \sigma_1^2}$ . To double the variance of  $e_1$  (on the original, non-log scale), we solve:  $(e^{\sigma_2^2} -$   
 13  $1)e^{2\mu_1 + \sigma_2^2} = 2(e^{\sigma_1^2} - 1)e^{2\mu_1 + \sigma_1^2}$  for  $\sigma_2$ . For  $\sigma_1 = 0.54$  (the initial value of in  $\sigma_1$  used in the Example,  
 14 main text), we use  $\sigma_2 = 0.67$  to double the variance of  $e_1$ .

15 We use a beta prior for  $R_{10}$ :

16 4A)  $f_{R_{10}}(p_1) = \frac{\Gamma(\alpha_1 + \beta_1)}{\Gamma(\alpha_1)\Gamma(\beta_1)} p_1^{\alpha_1 - 1} (1 - p_1)^{\beta_1 - 1}$ ,  $0 < p_1 < 1$

17 and a beta prior for  $R_{01}$ :

18 5A)  $f_{R_{01}}(p_2) = \frac{\Gamma(\alpha_0 + \beta_0)}{\Gamma(\alpha_0)\Gamma(\beta_0)} p_0^{\alpha_0 - 1} (1 - p_0)^{\beta_0 - 1}$ ,  $0 < p_0 < 1$

19  $f_{R_{10}}(p_1)$  and  $f_{R_{01}}(p_0)$  are 0 for  $p_1$  or  $p_0 \notin [0, 1]$ .

20 The priors  $f_{R_{01}}(p_0)$  and  $f_{R_{10}}(p_1)$  are non-informative uniform priors if we use  $\alpha_j = \beta_j = 1$ .

21 Posterior Distribution

22 For analysis of  $CE_{10}$ , the posterior distribution is:

23 6A)  $f_{R_{10}, R_{01}, \kappa_1 | Y_1, Y_0}(p_1, p_0, e_1 | y_1, y_0)$   
 24 
$$= \frac{1}{G} p_1^{y_1} (1 - p_1)^{(M_{10}-y_1)} \frac{\Gamma(\alpha_1 + \beta_1)}{\Gamma(\alpha_1)\Gamma(\beta_1)} p_1^{\alpha_1 - 1} (1 - p_1)^{(\beta_1 - 1)} p_0^{y_0} (1 - p_0)^{M_{01} - y_0} \frac{\Gamma(\alpha_0 + \beta_0)}{\Gamma(\alpha_0)\Gamma(\beta_0)}$$
  
 25 
$$\times p_0^{\alpha_0 - 1} (1 - p_0)^{\beta_0 - 1} \frac{1}{e_1} e^{-\frac{1}{2}(\ln(e_1) - \mu_1)^2 / \sigma_1^2}$$

$$\begin{aligned}
 &= \frac{1}{G} p_1^{y_1 + \alpha_1 - 1} (1 - p_1)^{M_{10} - y_1 + \beta_1 - 1} p_0^{y_0 + \alpha_0 - 1} (1 - p_0)^{M_{01} - y_0 + \beta_0 - 1} \frac{1}{e_1} e^{-\frac{1}{2}(\ln(e_1) - \mu_1)^2 / \sigma_1^2} \\
 &\quad \text{for } 0 < p_1 < 1, 0 < p_0 < 1, \text{ and } 0 < e_1 < \infty, \text{ and} \\
 &= 0 \text{ elsewhere,}
 \end{aligned}$$

$$\text{where } \frac{1}{G} = \frac{\Gamma(M_{10} + \alpha_1 + \beta_1)}{\Gamma(y_1 + \alpha_1)\Gamma(M_{10} - y_1 + \beta_1)} \frac{\Gamma(M_{01} + \alpha_0 + \beta_0)}{\Gamma(y_0 + \alpha_0)\Gamma(M_{01} - y_0 + \beta_0)} \frac{1}{\sigma_1 \sqrt{2\pi}}.$$

The posterior distribution for analysis of  $CE_{10}$  is the product of two independent *beta* distributions and a *log-normal* distribution. It is therefore straightforward to sample from this joint distribution, by independently sampling:  $p_1$  (for  $R_{12}$ ) from a  $beta(y_1 + \alpha_1, M_{10} - y_1 + \beta_1)$ ,  $p_0$  (for  $R_{01}$ ) from  $beta(y_0 + \alpha_0, M_{01} - y_0 + \beta_0)$ , and  $e_1$  (for  $\kappa_1$ ) from a  $log-normal(\mu_1, \sigma_1^2)$  distribution.

### Evaluation

To evaluate the posterior distribution, the supplemental R code (Web Appendix S3) performs the described sampling in 100,000 independent replications. For each sample, it calculates  $\frac{1}{\varepsilon_1} \frac{R_{10}(1 - R_{01} + \varepsilon_1 R_{01})}{R_{01}}$  (or  $\frac{R_{10}}{R_{01}(\varepsilon_2 - \varepsilon_2 R_{10} + R_{10})}$ ), equal to the parameter of interest  $CE_{10}$  (or  $CE_{01}$ ). It then calculates desired statistics from the empiric distribution of sampled values (e.g., 2.5 and 97.5 percentiles for the 95% credibility interval for  $CE_{10}$ , and the 50<sup>th</sup> percentile for the median). The program uses  $\alpha_i = \beta_i = 1$  as the default parameters for the *beta* distribution, as this choice yields uninformative, uniform priors. The user must input the parameters of the log-normal prior distribution of  $\kappa_i$  (details and further explication in Web Appendices S1-S2).



1 **Table 1** Summary of Parameter Definitions and relationship to Causal Effects

| Parameter Symbol                                   | Definition                                                                                                                                       |
|----------------------------------------------------|--------------------------------------------------------------------------------------------------------------------------------------------------|
| $M_{en}$                                           | Number at risk at baseline in cohort, with $E = e, N = n$ for $e, n = 0,1$                                                                       |
| $R_{en}$                                           | Risk during follow-up among those with $E = e, N = n$ for $e, n = 0,1$                                                                           |
| $R_{enu}$                                          | Risk during follow-up among those with $E = e, N = n, U = u$ for $e, n = 0,1$                                                                    |
| $R_e$                                              | Risk during follow-up among those with $E = e$ for $e = 0,1$                                                                                     |
| $RR_e$                                             | Risk ratio comparing risk among those with $E = e, N = 1$ to that among those with $E = e, N = 0$ for $e = 0,1$ ; e.g., $RR_1 = R_{11}/R_{10}$ . |
| $Y(e)$                                             | Counterfactual value of $Y$ if $E$ were set to $e$                                                                                               |
| $R_{en}(e')$                                       | Counterfactual risk among those with $E = e, N = n$ , if $E$ were set to $e'$ for $e, n, e' = 0,1$ .                                             |
| $R_{enu}(e')$                                      | Counterfactual risk among those with $E = e, N = n, U = u$ , if $E$ were set to $e'$ for $e, n, e' = 0,1$ .                                      |
| $CE_{en}$                                          | Causal effect of $E$ among those with $E = e, N = n$ for $e, n = 0,1$ ; $CE_{en} = R_{en}(1)/R_{en}(0)$                                          |
|                                                    |                                                                                                                                                  |
| $\varepsilon_1 (\varkappa_1)^\ddagger$             | Bias Parameter for Probabilistic bias of $CE_{10}$ ; Equation 5, Assumption A5c                                                                  |
| $\varepsilon_2 (\varkappa_2)^\ddagger$             | Bias Parameter for Probabilistic bias of $CE_{01}$ ; Equation 6, Assumption A5d                                                                  |
| $\varepsilon_3, \varepsilon_4^{\ddagger, \dagger}$ | Bias Parameter for Probabilistic bias Analyses of $CE_{11}, CE_{00}$ ; Assumption A7                                                             |

2 <sup>‡</sup>bias parameter for probabilistic bias analysis; corresponding parameter for Bayesian analysis in Parentheses

3 <sup>†</sup>These parameters discussed and used for probabilistic bias analyses for  $CE_{11}$  and  $CE_{00}$ .

4

5 **Table 2** Distribution of Self-harm Episodes ( $Y$ ), Hormone Use ( $E$ ), Prior Vaccination ( $N$ )

| Variable                          | - Value of the Variable - |     |     |     |     |     |    |     |
|-----------------------------------|---------------------------|-----|-----|-----|-----|-----|----|-----|
|                                   | 1+                        | 0   | 1+  | 0   | 1+  | 0   | 1+ | 0   |
| Number self-harm episodes ( $Y$ ) | 1+                        | 0   | 1+  | 0   | 1+  | 0   | 1+ | 0   |
| Hormone use ( $E$ ; yes/no)       | yes                       | yes | no  | no  | yes | yes | no | no  |
| Vaccinated ( $N$ ; yes/no)        | yes                       | yes | yes | yes | no  | no  | no | no  |
| Number with this combination      | 10                        | 58  | 30  | 152 | 11  | 116 | 42 | 380 |

6

7 **Table 3.** Summary of Estimated Values of Selected, Identifiable Parameters in the Example

| Parameter | Estimated Value | Description                                                          |
|-----------|-----------------|----------------------------------------------------------------------|
| $cRR$     | 0.88            | crude Risk Ratio – association of risk with $E$                      |
| $mRR$     | 0.88            | Mantel-Haenszel Risk Ratio, adjusted for the negative control        |
| $RR_1$    | 1.70            | Risk ratio for association of risk with $N$ among those with $E = 1$ |
| $RR_0$    | 1.66            | Risk ratio for association of risk with $N$ among those with $E = 0$ |
| $R_{10}$  | 0.087           | Risk among those with $E = 1$ and $N = 0$                            |
| $R_{01}$  | 0.165           | Risk among those with $E = 2$ and $N = 1$                            |

8

1

Figure 1

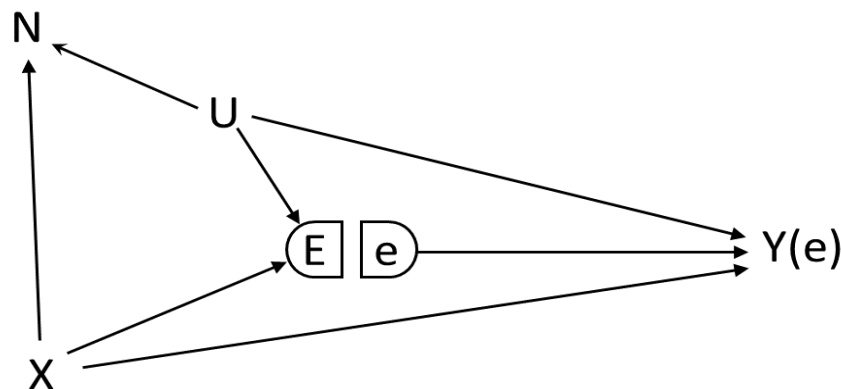

$N$  and  $Y$  are expected to be associated, with or without conditioning on  $E$ .

2

3 Single World Intervention Template (SWIT)<sup>18</sup> showing causal relationships.  $E$  represents the exposure  
4 variable,  $X$  measured confounder(s),  $U$  unmeasured confounder(s),  $N$  a negative control and  $Y(e)$  the  
5 potential outcome of  $Y$  if  $E$  were set to  $e$ . These relationships are assumed correct, and are consistent  
6 with assumptions A1–A4.

7

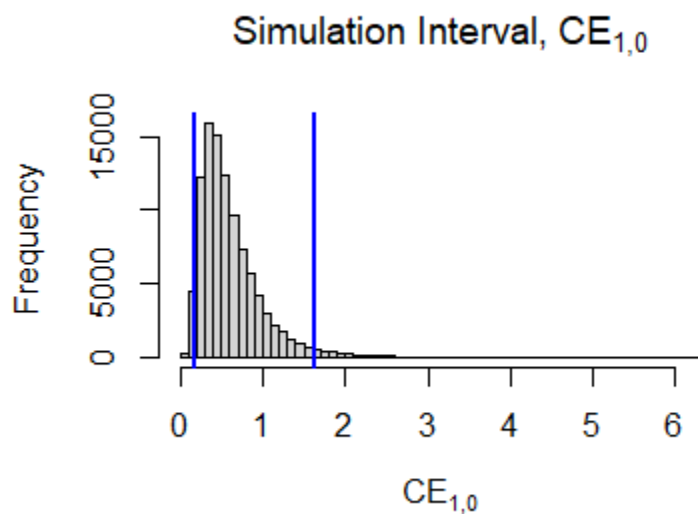

Blue lines indicate 2.5 and 97.5 Percentiles

8

9 Figure 2. Histogram showing the distribution of confounding-adjusted causal effect estimates from  
10 probabilistic bias analysis, with the prior distribution of the bias parameter as described for the Example.

11

1 **Online Supplement**

2 **Web Appendix S1**

3 This Web Appendix (S1) includes additional comments about use of the R programs (Web Appendix S2  
4 and S3).

5 Probabilistic bias analyses (R program in Appendix S2) require the user to specify a distribution for  $\varepsilon_1$  (or  
6  $\varepsilon_2$ ). Specifying a distribution with a median of 1 (e.g., as in the example, main text), would be  
7 appropriate if *a priori* information suggested that the counterfactual odds  $\frac{R_{10}(0)}{1-R_{10}(0)}$  is expected to exceed  
8 the true, identifiable odds  $\frac{R_{01}}{1-R_{01}}$  with about 50-50 probability. However, if *a priori* information suggests  
9 that the counterfactual odds is more likely than not to be larger than the identifiable odds  $\frac{R_{01}}{1-R_{01}}$  or,  
10 similarly, that  $R_{10}/R_{01}$  is likely to over-estimate the causal effect  $CE_{10}$ , then the median should be chosen  
11 greater than 1. This might reflect a situation in which exposure was more strongly associated with high-  
12 risk values of U than was the negative control. Conversely, if the counterfactual odds is more likely than  
13 not to be smaller than the identifiable odds  $\frac{R_{01}}{1-R_{01}}$ , then the median should be chosen less than 1. The  
14 variance reflects uncertainty, with larger variances indicating a wider range of values of  $\varepsilon_1$  judged to be  
15 compatible with a priori information.

16 Bayesian analyses require the user to specify the prior distribution of  $\kappa_1$  (corresponding comments also  
17 hold for  $\kappa_2$ ). To do so using the R program supplied (Appendix S3), the user inputs the median of  $\kappa_1$ ,  
18 which is the mode of the *log-normal* distribution used as the prior for  $\kappa_1$ . The log-normal parameter  $\mu_1$   
19 (equation 6A of the Appendix, main text) is the logarithm of this median. The user also inputs the desired  
20 value for the ratio of the 10<sup>th</sup> percentile of  $\kappa_1$  divided by the median in the distribution of  $\kappa_1$ . The program  
21 uses these inputs to calculate the variance  $\sigma_1^2$  (equation 6A of the Appendix 2, main text) that yields these  
22 user-supplied percentiles. It then generates random samples from the posterior distribution (that depends  
23 on the parameters as described. To illustrate, suppose, for example, that the researcher thought that the  
24 median was 1 and that the 10<sup>th</sup> percentile was one-half as large as the median. This relationship would  
25 hold if the standard deviation of the log-normal prior were set to 0.54. In this case, the prior would  
26 specify that 80% of the values of  $\kappa_1$  were between 0.5 (the 10 percentile) and 2.0 (the 90 percentile).  
27 Since  $f_{\kappa_1}(\ln(e_1)|data) = f_{\kappa_1}(\ln(e_1))$ , i.e. the posterior and prior are the same for  $\kappa_1$ , we expect the  
28 Bayesian analysis to agree closely with the probabilistic bias analysis.

29 Note S1: The analysis described for  $CE_{10}$  (or  $CE_{01}$ ) is fully Bayesian as all parameters needed to write the  
30 (conditional) probability of the data used have a prior, a reflection of the relationships in equations 2A-

1 6A, Appendix 2 of the main text. In particular, a prior distribution for the causal effects  $CE_{10}$  (or  $CE_{01}$ ) is  
2 indirectly specified through the priors for  $R_{10}$ ,  $R_{01}$  and  $\kappa_1$  (or  $\kappa_2$ ).

3 Note S2: To measure causal effects using risk odds ratios (rather than risk ratios as above), then we can  
4 define  $CE_{10}' = \frac{R_{10}(1)/(1-R_{10}(1))}{R_{10}(0)/(1-R_{10}(0))}$ . The definitions (of  $R_{10}$ ,  $R_{01}$ ,  $\kappa_1$  and  $CE_{10}$ ) and distributions above are  
5 unchanged (programs to conduct probabilistic bias and Bayesian analyses using risk ratios are given in  
6 Web Appendices S2 and S3).

7 Comparison of the prior distribution for  $\kappa_1$ , illustrated by empirically simulating it (Figure S1) for the  
8 situation described in the example (main text), with the corresponding posterior distribution (Figure S2)  
9 shows a meaningful shift (e.g. median changes from 0.99 to 0.48), illustrating that the data do provide  
10 information about the causal effect under the assumed priors.

11 Note S3: Specification of priors for  $R_{10}$ ,  $R_{01}$  and  $\kappa_1$  implies a prior for  $CE_{10}$  because of the deterministic  
12 relationships (equation 5, main text). In view of these inter-relationships of the parameters, specifying a  
13 prior for the causal effects themselves, e.g. for  $CE_{10}$ , in addition to priors for  $R_{10}$ ,  $R_{01}$  and  $\kappa_1$  could lead  
14 to inconsistencies in view of the deterministic relationships. However, one could specify priors for, say,  
15  $R_{10}$ ,  $\kappa_1$  and  $CE_{10}$ , but not, say,  $R_{01}$ . In this case the posterior distribution would be different from that in  
16 Appendix 2 (main text), but could be evaluated using Gibbs sampling or other Markov Chain Monte  
17 Carlo approach. Here, the approach implemented in the program specifies a prior for the causal effect  
18 ( $CE_{10}$ ) indirectly through those for  $R_{10}$ ,  $R_{01}$  and  $\kappa_1$  (Figure S1; the prior for example of main text), and  
19 does not separately specify a prior for  $CE_{10}$ .

20 Note S4: If direct evidence, *a priori* considerations or otherwise expected differences between the  $E$  and  
21  $N$  conditional distributions (departures from assumption A5) suggest that  $R_{10}(0)$  will tend to exceed  $R_{01}$   
22 so that  $\kappa_1$  is less than 1 (in Assumption A5a), that would suggest that  $E$  tends to more strongly associate  
23 with high-risk values of  $U$  than does  $N$ . This pattern suggests that  $R_{01}(1)$  should tend to be less than  $R_{10}$   
24 and that  $\kappa_2$  may be greater than 1. These considerations suggest, that if the prior distribution of  $\kappa_1$  has  
25 substantial mass below 1, then that for  $\kappa_2$  might reasonably be specified to have substantial mass above 1  
26 (and conversely).

## 27 **Web Appendix S2**

28 Appendix S2 is an R program for Probabilistic Bias Analysis; effects are measured using risk ratios (See  
29 also Web Appendix S1).

```
30 # Probabilistic Bias Analysis for Causal Effect CE21 (or CE12), using Risk Ratios  
31 library(tidyverse)  
32 library(pscl)  
33 library(dplyr)
```

```
1 library(data.table)
2 library(readxl)
3 # ----- user inputs ----- #
4 med = 1 #user input, desired median (log(med)=mean yields mu, of log-normal dist)
5 q10 = 0.5 #user input, desired ratio: 10-percentile/med: used to calculate sd
6 n=100000 #user input, number of random draws
7 N = 1
8
9 ## ----- input data -----
10 dat <- array( rep(0,8), dim=c(2,2,2))
11 dat[1,1,1]= 10 #P(Y=1, E=1, NC=1)
12 dat[2,1,1]= 58
13 dat[1,2,1]= 30
14 dat[2,2,1]= 152
15
16 dat[1,1,2]= 11 #P(Y=1,E=1,NC=2)
17 dat[2,1,2]= 116
18 dat[1,2,2]= 42
19 dat[2,2,2]= 380
20
21 n1 = dat[1,1,2]+dat[2,1,2]
22 n2 = dat[1,2,1]+dat[2,2,1]
23
24 ## ----- END: input data -----
25
26 save = NULL
27
28 # ----- calculate conditional Probs from input dat, so they to sum to 1
29 for (j in 1:2){
30   for (k in 1:2){
31     dat[1,j,k]=dat[1,j,k]/sum(dat[,j,k])
32     dat[2,j,k]=1-dat[1,j,k]
33   }
34 }
35 # ----- END: calculate cond probs.
36
37 AVERAG<-0
38 use=NULL
39 # =====
40 # ===== Crude Risk Ratio =====
41 RR1= dat[1,1,1]/dat[1,1,2]
42 RR2= dat[1,2,1]/dat[1,2,2]
43 cRR = (dat[1,1,1]+dat[1,1,2])/sum(dat[,1,])
44 cRR = cRR/((dat[1,2,1]+dat[1,2,2])/sum(dat[,2,]) )
45 R11= dat[1,1,1]
46 R12= dat[1,1,2]
47 R21= dat[1,2,1]
48 R22= dat[1,2,2]
49
50 mRR= dat[1,1,1]*(dat[1,2,1]+dat[2,2,1])/sum(dat[,1])
51 mRR=mRR+ dat[1,1,2]*(dat[1,2,2]+dat[2,2,2])/sum(dat[,2])
```

```
1 den= dat[1,2,1]*(dat[1,1,1]+dat[2,1,1])/sum(dat[,1])
2 den=den+ dat[1,2,2]*(dat[1,1,2]+dat[2,1,2])/sum(dat[,2])
3 mRR= mRR/den
4 mRR
5 #RD_E.NC #association of E, NC
6
7 crude=data.frame(RR1=RR1, RR2=RR2, R11=R11, R12=R12, R21=R21, R22=R22, cRR) #RD for
8 Exposure, then for NC
9 crude
10 c(R11/R12, R21/R22) #Y-assoc with N|E=1 or 2
11 #
12 # ----- start log-normal, prior for e1 -----;
13 z10=qnorm(0.10, mean=0, sd = 1) #get z-score @ 10-percentile
14 sd = (log(q10)-log(med))/z10 #set sd on log scale so (log(q10)-log(med))/sd)=z10
15 z90=qnorm(0.90, mean=0, sd = 1)
16 c(z10, z90)
17 c(exp( log(med)+z10*sd),exp( log(med)-z10*sd) )
18 e1= rnorm(n, log(med), sd)
19 #e2= rnorm(n, -log(med), sd) #use symmetric value for e2, per Note S4
20 e1=exp(e1)
21 c(quantile(e1, probs=c(0.025, 0.5, 0.975)), sd) #display 95% interval for e1
22 #e2=exp(e2)
23 #c(exp(qnorm(0.10, mean=0, sd = sd) ),
24 # exp(qnorm(0.90, mean=0, sd = sd) ) ) #display 20%, 80% of epsilon
25 #reverse the order
26 R12_0 = (e1*R21/(1-R21))/(1+(e1*R21/(1-R21))) # calc R12(0) from R21 1st (use obs'd R21)
27 #r21 = rbinom(n, n2, R21)/n2 # sample R21, with random error
28 r12_0 = rbinom(n, n2, R12_0)/n2 # sample R12(0), with random error
29 r12 = rbinom(n, n1, R12 )/n1 # sample R12, with random error
30 # in Example, v. similar result if change, sample R21 & R12 1st, correct w/ e1 last
31 # CE12= r12*(1-r21+e1*R21)/(e1*r21) # use this if change order, RR for CE10; modify for ROR
32 CE12 = r12/r12_0 # RR for CE10
33 #CE21= r12/(r21*(e2-e2*r12+r12)) # use this if desire RR; modify for ROR
34 # ----- Figure 2 -----
35 hist(CE12, breaks=50, main=expression("Simulation Interval, CE"[paste(1,",",0)]),
36 xlab = expression("CE"[paste(1,",",0)]),
37 sub="Blue lines indicate 2,5 and 97.5 Percentiles", cex.sub = 0.8)
38 abline(v=quantile(CE12, probs= 0.975),col="blue",lwd=2)
39 abline(v=quantile(CE12, probs= 0.025),col="blue",lwd=2)
40 quantile(CE12, probs=c(0.025, 0.5, 0.975)) # display empiric 95% credibility interval
41
42 Web Appendix S3
43 R program for Bayesian analyses, described in Appendix 2, main text (see also Web Appendix S1);
44 effects measured using risk ratios.
45 # Bayesian Analysis for Causal Effect CE12 (or CE21), using Risk Ratios
46 library(tidyverse)
47 library(pscl)
48 library(dplyr)
49 library(data.table)
50 library(readxl)
```

```
1 # ----- user inputs ----- #
2 med = 1 #user input, desired median (log(med)=mean yields mu, of log-normal dist)
3 ratio_10 = 0.5 #user input, desired ratio: 10-percentile/med: used to calculate sd
4 n=100000 #user input, number of random draws
5
6 ## ----- input data -----
7 dat <- array( rep(0,8), dim=c(2,2,2))
8 dat[1,1,1]= 10 #P(Y=1, E=1, NC=1)
9 dat[2,1,1]= 58
10 dat[1,2,1]= 30
11 dat[2,2,1]= 152
12
13 dat[1,1,2]= 11 #P(Y=1,E=1,NC=2)
14 dat[2,1,2]= 116
15 dat[1,2,2]= 42
16 dat[2,2,2]= 380
17 # ===== ----- Some Risks, ORs, & RRs ----- =====
18 OR1= (dat[1,1,1]/dat[2,1,1])/(dat[1,1,2]/dat[2,1,2])
19 OR2= (dat[1,2,1]/dat[2,2,1])/(dat[1,2,2]/dat[2,2,2])
20
21 RR1= (dat[1,1,1]/dat[1,1,2])/((dat[1,1,1]+dat[2,1,1])/(dat[1,1,2]+dat[2,1,2]))
22 RR2= (dat[1,2,1]/dat[1,2,2])/((dat[1,2,1]+dat[2,2,1])/(dat[1,2,2]+dat[2,2,2]))
23 R11= dat[1,1,1]
24 R12= dat[1,1,2]/(dat[1,1,2]+dat[2,1,2])
25 R21= dat[1,2,1]/(dat[1,2,1]+dat[2,2,1])
26 R22= dat[1,2,2]
27 cRR = (dat[1,1,1]+dat[1,1,2])/((dat[1,1,1]+dat[2,1,1]+dat[1,1,2]+dat[2,1,2]))
28 cRR = cRR /((dat[1,2,1]+dat[1,2,2])/((dat[1,2,1]+dat[2,2,1]+dat[1,2,2]+dat[2,2,2])))
29 aRR = dat[1,1,1]*(dat[1,2,1]+dat[2,2,1]) + dat[1,1,2]*(dat[1,2,2]+dat[2,2,2])
30 aRR=aRR/( dat[1,2,1]*(dat[1,1,1]+dat[2,1,1]) + dat[1,2,2]*(dat[1,1,2]+dat[2,1,2]))
31
32 crude=data.frame(OR1=OR1, OR2=OR2, RR1=RR1, RR2=RR2, R11=R11, R12=R12, R21=R21,
33 R22=R22) #RD for Exposure, then for NC
34 (R12/(1-R12))/(R21/(1-R21))
35 crude
36 y1= dat[1,1,2]
37 n1= dat[2,1,2]+y1
38 y2= dat[1,2,1]
39 n2= dat[2,2,1]+y2
40 # -- first, sample r21 & r12
41 r21= rbeta(n, y2+1, n2-y2+1)
42 r12= rbeta(n, y1+1, n1-y1+1)
43 # -- second, sample e1 from log-normal prior
44 # use input median and ratio of median to 10th percentile: get sd
45 z10=qnorm(0.10, mean=0, sd = 1) #get z-score @ 10-percentile
46 sd = (log(ratio_10)-log(med))/z10 #set sd on log scale so (log(ratio_10)-log(med))/sd=z10
47 z90=qnorm(0.90, mean=0, ratio_10, sd = 1)
48 c(z10, z90, med, sd)
49 c(exp( log(med)+z10*sd),(med),exp( log(med)-z10*sd) ) #display e1 at 10%, 50%, 90%
50 #sd= sd3 #<----- set sd=sd3 for sensitivity analyses to double Var of prior
51 #if sd= sd3 NOT commented out, doubles Var (value from end of pgm)
```

```
1 #for Example, sd=0.674 <-- use to double variance from initial value of 0.54
2 e1= rnorm(n, log(med), sd) #sd, sd3 in a sens Anal w/ double Var
3 c(exp(qnorm(0.10, mean=log(med), sd = sd) ),
4   exp(qnorm(0.90, mean=log(med), sd = sd) ) ) #display empiric 20%, 80% of e1
5 e1=exp(e1)
6 # ----- END: sample e1 from log-normal prior -----;
7
8 #quantile( e1, probs=c(0.025, 0.5, 0.975)) #display 2.5th 97.5 percentiles
9 CE12= r12*(1-r21+e1*R21)/(e1*r21) # use this for RR, could do ROR
10
11 #CE21= r12/(r21*(e2-e2*r12+r12)), for RR
12 # ----- Figure S2 -----
13 hist(CE12, breaks=50, main=expression("Posterior Distribution CE"[paste(1,",",0)]),
14     xlab = expression("CE"[paste(1,",",0)]),
15     sub="Blue lines indicate 95% Credibility Interval", cex.sub = 0.8)
16 abline(v=quantile(CE12, probs= 0.975),col="blue",lwd=2)
17 abline(v=quantile(CE12, probs= 0.025),col="blue",lwd=2)
18 quantile(CE12, probs=c(0.025, 0.5, 0.975)) # display empiric 95% credibility interval
19
20 c(R12/(R12+dat[2,1,2]), R21/(R21+dat[2,2,1]), RR1, RR2, cRR, aRR)
21 # ----- empirically evaluate prior for CE -----
22 prior=FALSE
23 if (prior==TRUE){
24   r21= rbeta(n, 1, 1)
25   r12= rbeta(n, 1, 1)
26   e1= rnorm(n, log(med), sd)
27   e1=exp(e1)
28   s2=sd**2
29   c(var(e1), (exp(s2) -1)*exp(s2) )
30   CE12= r12*(1-r21+e1*R21)/(e1*r21) # use this for RR, could do ROR
31   quantile(CE12, probs=c(0.025, 0.5, 0.975))
32   parm2 = as_tibble(CE12, CE=CE12)
33   names(parm2)="CE"
34   parm2
35   parm2 = subset(parm2, parm2$CE< 30)
36   # ----- Figure S1 -----
37   hist(parm2$CE, breaks=50, main=c(expression("Prior Distribution CE"[paste("1",",",",0")])*~"(truncated
38   to display)")),
39     sub="Blue lines indicate 2.5th and 97.5 percentile", cex.sub = 0.8,
40     xlab = expression("CE"[paste(1,",",0)]))
41   abline(v=quantile(parm2$CE, probs= 0.975),col="blue",lwd=2)
42   abline(v=quantile(parm2$CE, probs= 0.025),col="blue",lwd=2)
43   }
44 # for use in Sensitivity (Bayesian analyses) find sd* that double var on e-scale
45 #solver - arbitrary function called fx(x), one variable
46 fx<- function(x){ #just an example
47   s1=0.54**2 #var used (log-scale), solve for x for Var doubles (real scale)
48   2*(exp(2*s1)-exp(s1) ) - (exp(2*x)-exp(x) ) }
49 sd3=sqrt(uniroot(fx,interval=c(-10,3))$root )
50 c(sd, sd3 ) #set sd=sd3 for sensitivity analyses to double Var of prior
```



1 **Web Appendix S4**

2 Lipsitch et al<sup>1</sup> note that an ideal negative control exposure would have the same causes in common with  
 3 the outcome as did the actual exposure. Figure S3 is a single world intervention graph in which  $E$  and  $N$   
 4 have different causes in common with  $Y$ , but wherein  $N$  can still serve as a negative control exposure.  
 5 Assumption (A5), while still possible, may be now less plausible.

6 **Web Appendix S5**

7 Claim 1: Under assumption (A1-A4) and (A5a) or (A5b): (i)  $R_{10}(0) = R_{01}$ ; and (ii)  $CE_{10}$  is identified by  
 8 the ratio of observable risks  $R_{10}/R_{01}$ .

9 Proof: Proofs of (i) under assumption A5a and (ii) are in the main text. Here we show that (A1-A4) and  
 10 (A5b) implies (i). By conditional independence of  $E$  and  $N$  (Assumption A1) and rules of conditional  
 11 probabilities:

12 1S)  $p(U = u|E = 1, N = 0) = p(E = 1|U = u)p(N = 0|U = u)p(U = u)$ , for all  $u$ , and:

13 2S)  $p(U = u|E = 0, N = 1) = p(E = 0|U = u)p(N = 1|U = u)p(U = u)$ , for all  $u$ .

14 From the last line of Equation 4) of the main text:

$$\begin{aligned}
 15 \quad R_{10}(0) &= \frac{\sum_u R_{01u} P(E=1|U=u)P(N=0|U=u)p(U=u)}{\sum_u p(E=1|U=u)p(N=0|U=u)p(U=u)} && \text{(Equation 4, main text)} \\
 16 \quad &= \sum_u R_{01u} p(U = u|E = 1, N = 0) && \text{(by Equation 1S)} \\
 17 \quad &= \sum_u R_{01u} p(U = u|E = 0, N = 1) && \text{(by Assumption A5b)} \\
 18 \quad &= \frac{\sum_u R_{01u} P(E=0|U=u)P(N=1|U=u)p(U=u)}{\sum_u p(E=0|U=u)p(N=1|U=u)p(U=u)} && \text{(by Equation 2S)} \\
 19 \quad &= R_{01} && \text{(equals } R_{01}, \text{ a weighted average).}
 \end{aligned}$$

20 Note: Equations 1S and 2S show that Assumption (A5b) is implied by (A5a) and that (A5b) is weaker.

21  
 22 Claim 2: Under assumptions (A1-A4, A5b),  $CE_{10} = CE_{01}$ .

23 Proof: The proof parallels that of Claim 1.  $R_{en}(e')$  is the weighted average of the counterfactual  
 24 outcomes  $R_{enu}(e')$ , weighted by  $P(U = u|E = e, N = n) = P(E = e|U = u)P(N = n|U = u)p(U =$   
 25  $u)/\sum_u P(E = e|U = u)P(N = n|U = u)p(U = u)$ , so:

$$\begin{aligned}
 26 \quad CE_{01} &= \frac{R_{01}(1)}{R_{01}(0)} \\
 27 \quad &= \frac{\sum_u R_{01u}(1)P(E=0|U=u)P(N=1|U=u)p(U=u)}{\sum_u p(E=0|U=u)p(N=1|U=u)p(U=u)} / \frac{\sum_u R_{01u}(0)P(E=0|U=u)P(N=1|U=u)p(U=u)}{\sum_u p(E=0|U=u)p(N=1|U=u)p(U=u)} \\
 28 \quad &= \sum_u R_{01u}(1)P(U = u|E = 0, N = 1) / \sum_u R_{01u}(0)P(U = u|E = 0, N = 1) \\
 29 \quad &= \sum_u R_{10u}(1)P(U = u|E = 0, N = 1) / \sum_u R_{10u}(0)P(U = u|E = 0, N = 1) \\
 30 \quad &= \sum_u R_{10u}(1)P(U = u|E = 1, N = 0) / \sum_u R_{10u}(0)P(U = u|E = 1, N = 0)
 \end{aligned}$$

$$\begin{aligned}
 &= \frac{\sum_u R_{10u}(1)P(E=1|U=u)P(N=0|U=u)p(U=u)}{\sum_u p(E=1|U=u)p(N=0|U=u)p(U=u)} / \frac{\sum_u R_{10u}(0)P(E=1|U=u)P(N=0|U=u)p(U=u)}{\sum_u p(E=1|U=u)p(N=0|U=u)p(U=u)} \\
 &= \frac{R_{10}(1)}{R_{10}(0)} = CE_{10}
 \end{aligned}$$

The second equality follows by properties of the counterfactuals  $R_{01}(1)$  and  $R_{01}(0)$ , the third equality by equations 1S and 2S, the fourth by assumptions (A1) and (A2), the fifth by assumption (A5b), the sixth by equations 1S and 2S, and the last two by definitions.

## Web Appendix S6

This Web Appendix contains additional, basic descriptive information about the cohort in the Example of the main text. First, we note that, during the follow-up period, the age of cohort members with gender-affirming hormone or puberty suppression therapy, was very similar to the age of those without that therapy by definition of the cohort. In particular, the therapy had to have been received by age 20, and the follow-up for the outcome of interest was from age 20 to age 21. Thus, age during the time at risk should not have led to meaningful confounding. Table S1 includes additional descriptive information for cohort of the example in the main text and shows reasonable degree of balance between treatment groups – so these factors should also not have led to meaningful confounding. Consistent with this, we did not adjust for additional covariates and did no modeling or smoothing; causal effect estimates for the example can be calculated from just the data in Table 2 (main text).

Table S1. Descriptive Information for Cohort of Example in the Main Text <sup>a</sup>

| Characteristic                                 | Gender-Affirming Therapy <sup>b</sup><br>N (%) | No Gender-Affirming Therapy<br>N (%) |
|------------------------------------------------|------------------------------------------------|--------------------------------------|
| <b>Ethnicity</b>                               |                                                |                                      |
| Hispanic                                       | 171 (28.3)                                     | 44 (22.6)                            |
| Non-Hispanic Black                             | 58 (9.6)                                       | 13 (6.7)                             |
| Other, including Non-Hispanic White            | 375 (62.1)                                     | 138 (70.8)                           |
| <b>Gender Identity</b>                         |                                                |                                      |
| Trans-feminine                                 | 261 (43.2)                                     | 89 (45.6)                            |
| Trans-masculine                                | 322 (53.3)                                     | 106 (54.4)                           |
| Transgender with unclear sex assigned at birth | 21 (3.5)                                       | 0 (0)                                |
| <b>Age at Index Date <sup>c</sup> (Years)</b>  |                                                |                                      |
| Mean (SD)                                      | 16.6 (1.9)                                     | 17.2 (1.8)                           |
| <b>All Subjects</b>                            | 604 (75.6)                                     | 195 (24.4)                           |

<sup>a</sup> Percentages may not sum to 100 due to rounding

<sup>b</sup> Receiving gender-affirming hormones at or before age 20

<sup>c</sup> Index date refers to the day of the first evidence of transgender status in Kaiser Permanente EMR

18

19

20

21

22

1

2 **References used in Web material**

- 3 1. Lipsitch M, Tchetgen E, Cohen T. Negative Controls: A Tool for Detecting Confounding and Bias  
4 in Observational Studies. *Epidemiology*. 2010;21(3):383-388.

5

1 Web Appendix, Figure S1

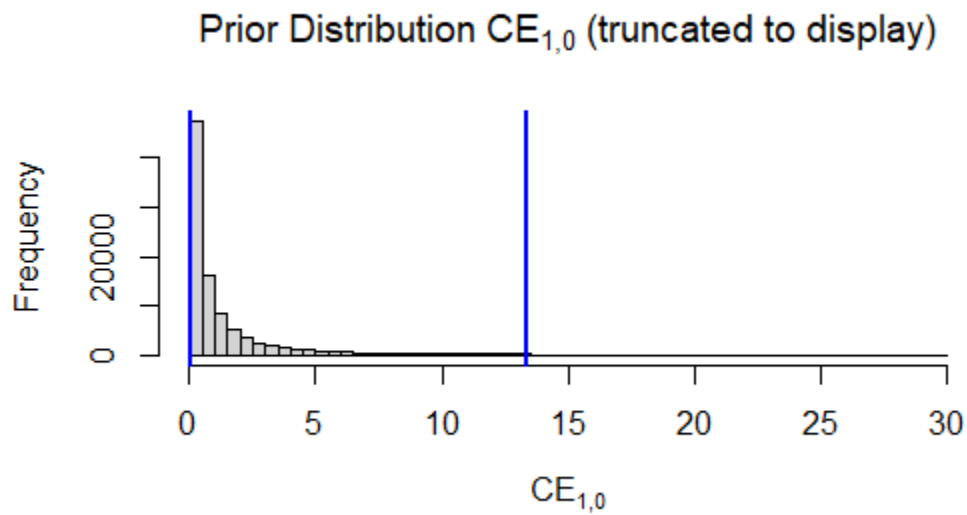

2 Blue lines indicate 2.5th and 97.5 percentile

3 Figure S1 describes the prior distribution of  $CE_{2,1}$  for the example in the main text; see also Web  
4 Appendix S1. Values of  $CE_{2,1}$  were truncated at 30 to display.

5

1 Web Appendix, Figure S2

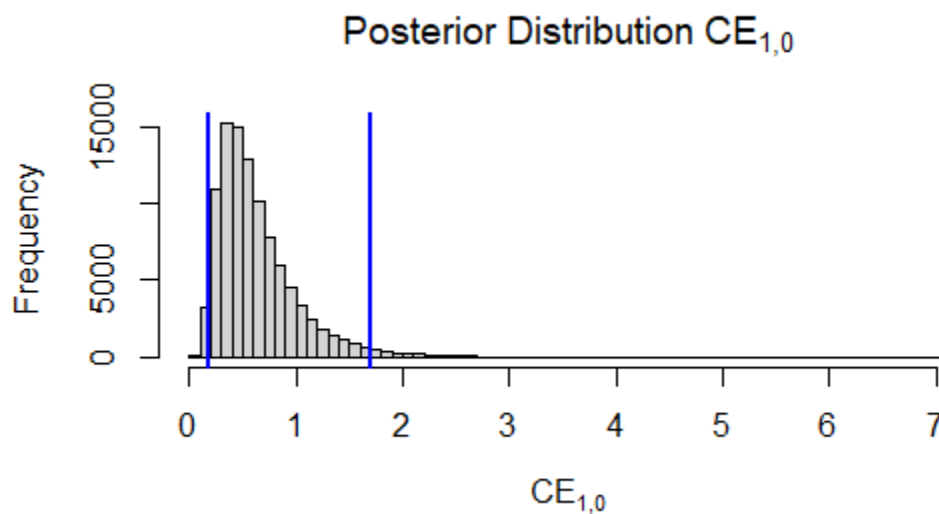

2 Blue lines indicate 95% Credibility Interval

3 Figure S2 describes the posterior distribution of  $CE_{2,1}$  for the example in the main text; see also Web  
4 Appendix S1. (Values not truncated.)

5

6 Web Appendix, Figure S3

Figure – S3

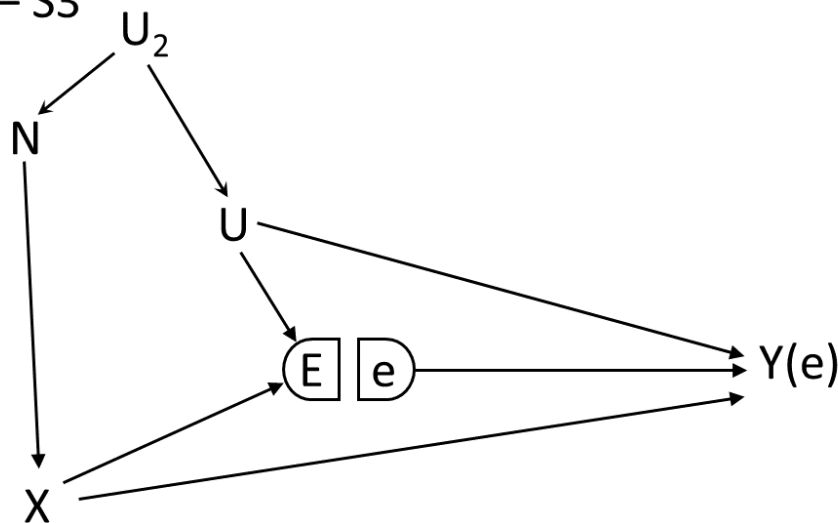

E and N have different causes in common with Y, but N can still serve as a negative control exposure; the equi-distributional assumption (A5a) or (A5b) may be less plausible.

7
